# Supplementary material for: 3D graphene decorated with nickel nanoparticles: in situ synthesis, enhanced dispersibility, and absorption-dominated electromagnetic interference shielding
Source: Royal Society of Chemistry journal article supplement (doi:10.1039/d3tc04134d), 2024-01-01
Supplement: d3tc04134d1.pdf [file d3tc04134d1.pdf]

## Supporting Information

# **3D graphene decorated with nickel nanoparticles: in-situ synthesis, enhanced dispersibility, and absorption-dominated electromagnetic interference shielding**

*Liqing Chen,<sup>a, b, c</sup> Nian Li,<sup>a, c, \*</sup> Xinling Yu,<sup>a, d</sup> Cui Liu,<sup>a, c</sup> Yanping Song,<sup>a, b, c</sup> Zhao Li,<sup>a, b, c</sup> Jun Kang,<sup>a, c</sup> Wenbo Wang,<sup>a, b, c</sup> Na Hong,<sup>a, b, c</sup> Hu Ge,<sup>a, d</sup> Pengzhan Yang,<sup>a, b, c</sup> Shudong Zhang,<sup>a, c, \*</sup> and Zhenyang Wang.<sup>a, c, \*</sup>*

<sup>a</sup> Institute of Solid-State Physics, Chinese Academy of Sciences, Hefei, Anhui 230031, China

<sup>b</sup> Department of Chemistry, University of Science and Technology of China, Hefei, Anhui 230026, China

<sup>c</sup> Key Laboratory of Photovoltaic and Energy Conservation Materials, Hefei Institutes of Physical Science, Chinese Academy of Sciences, Hefei 230031, China

<sup>d</sup> School of Advanced Manufacturing Engineering, Hefei University, Hefei, Anhui 230601, China

\* Corresponding authors. E-mail: linian@issp.ac.cn (Nian Li); sdzhang@iim.ac.cn (Shudong Zhang); zywang@iim.ac.cn (Zhenyang Wang).

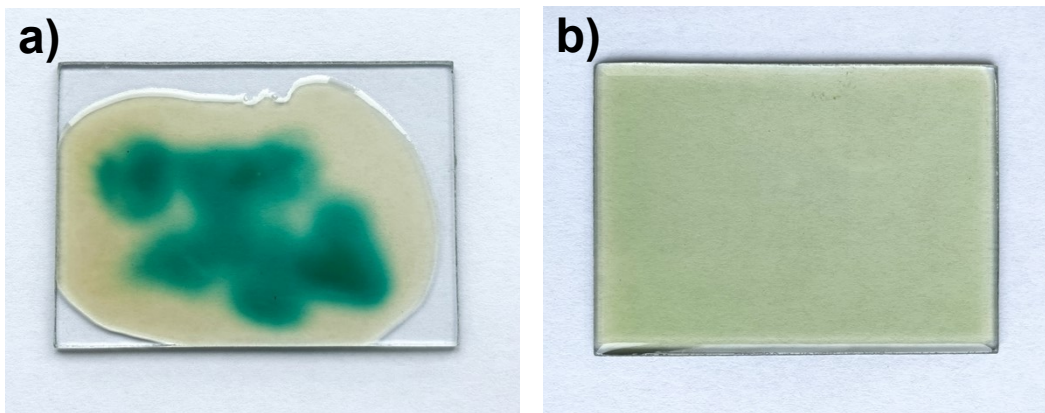

**Fig. S1.** The image of PI/Ni(II) on the glass plate obtained by thermal curing of NiCl<sub>2</sub> in (a) PAA and (b) PAA-COOH.

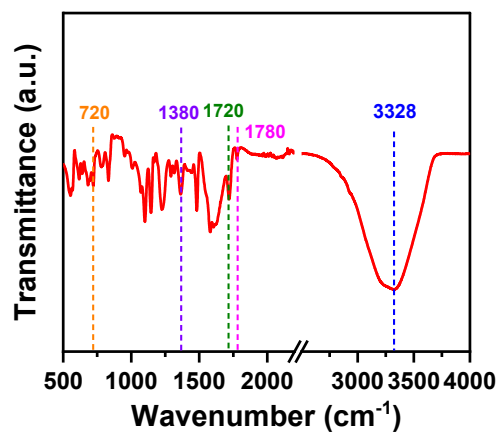

**Fig. S2.** FTIR spectrum of PI containing Ni(II).

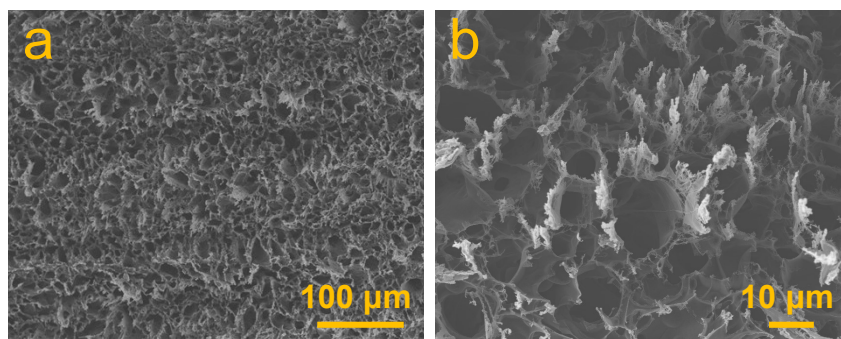

**Fig. S3.** (a, b) Top view SEM images of LIG/Cu.

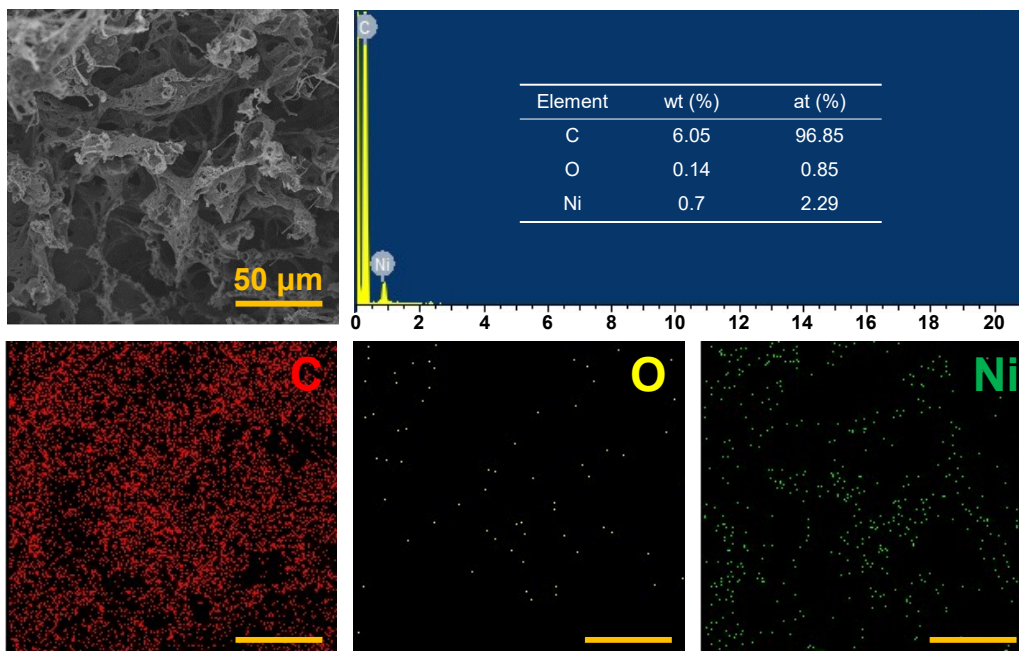

Fig. S4. SEM EDS elemental mappings of LiG/Ni.

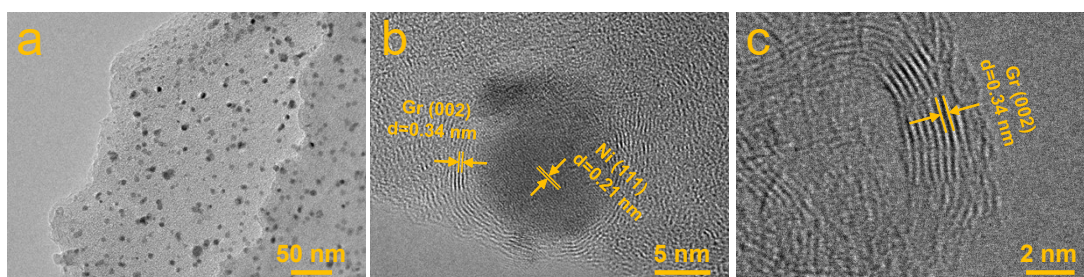

Fig. S5. (a) TEM image and (b, c) High-resolution TEM images of LiG/Ni.

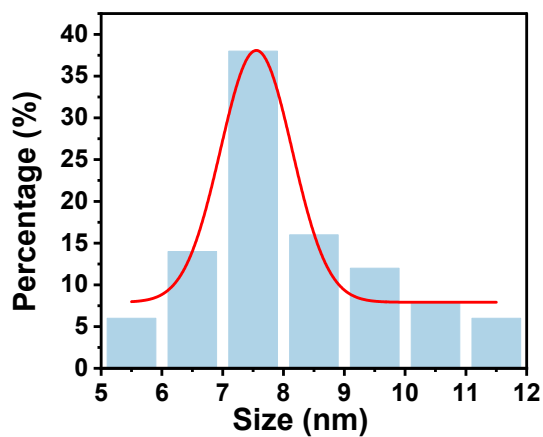

Fig. S6. Size distribution of Ni nanoparticles.

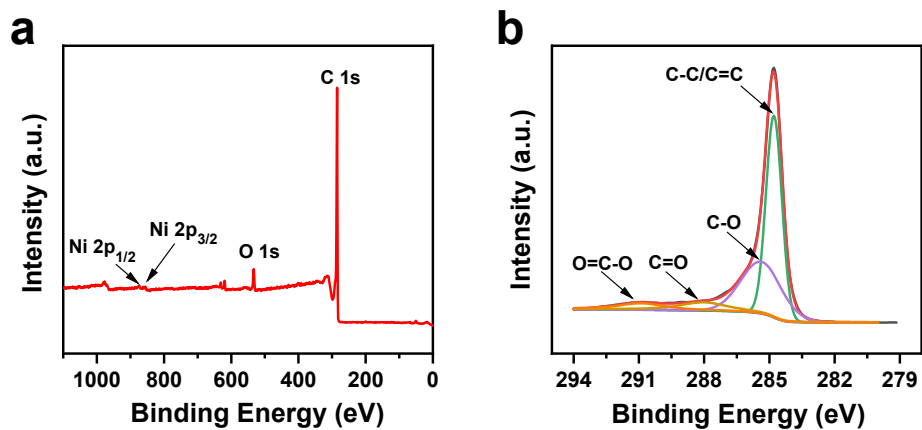

Fig. S7. (a) Full XPS spectrum of LIG/Ni. (b) High-resolution C 1s spectrum of LIG/Ni.

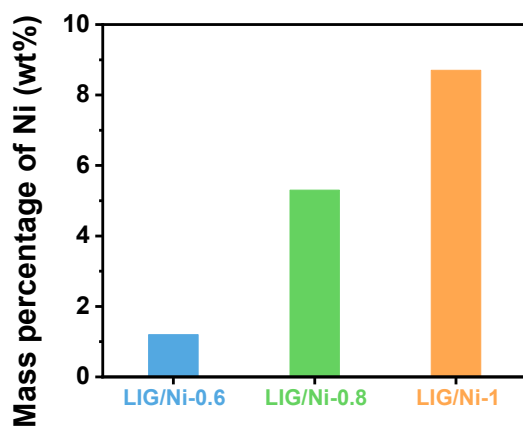

Fig. S8. Mass percentage of Ni for different samples.

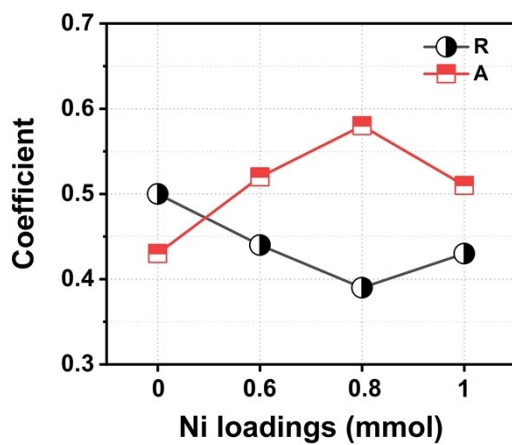

Fig. S9. A-R coefficients of different samples.

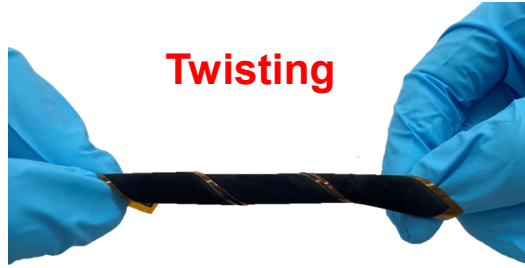

Fig. S10. Mechanical flexibility test of LIG/Ni.

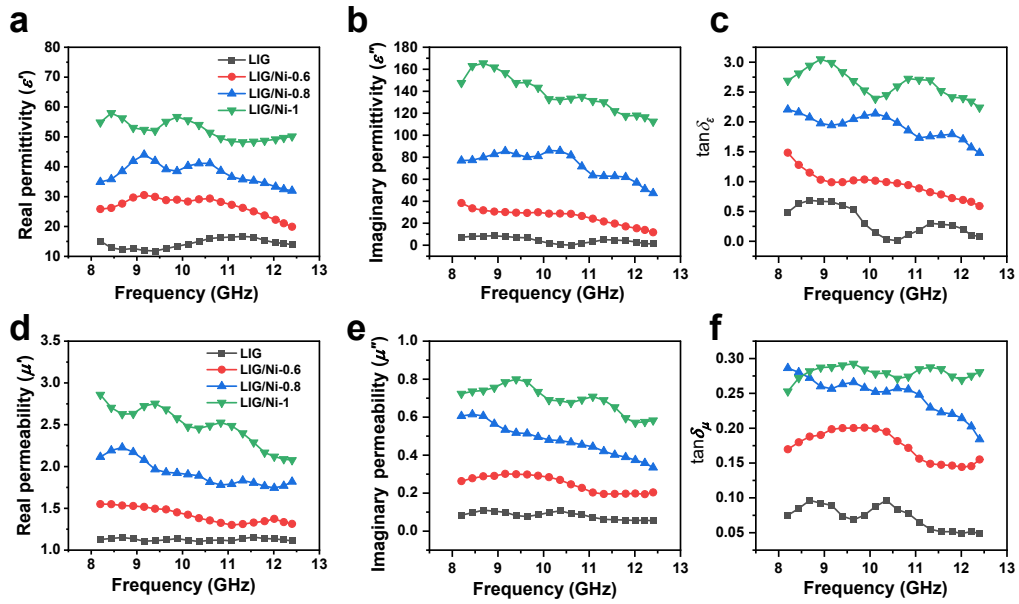

Fig. S11. (a-b) Complex permittivity and (c) dielectric loss of LIG/Ni with different Ni contents; (d-e) The complex permeability and (f) magnetic loss of LIG/Ni with different Ni contents.

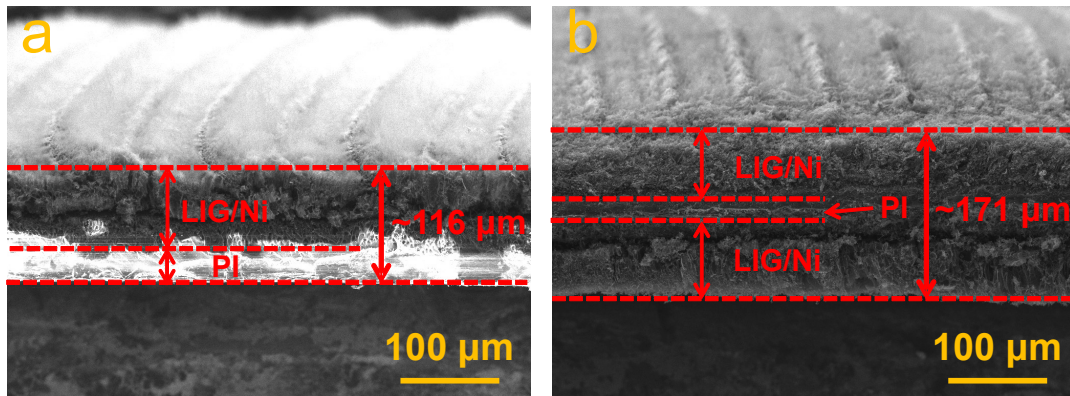

Fig. S12. Cross-sections SEM images of (a) LIG/Ni-0.8 and (b) D-LIG/Ni-0.8.

**Table S1.** Comparison of the EMI shielding performance (in the X-band) of the reported 3D carbon-based shielding materials in terms of filler content and thickness.

| Sample                                                  | Filler Content (wt%) | Thickness (mm) | EMI SE <sub>T</sub> (dB) | Ref.      |
|---------------------------------------------------------|----------------------|----------------|--------------------------|-----------|
| FeNi/CNT                                                | 30                   | 1.4            | 35.7                     | 1         |
| Fe <sub>3</sub> O <sub>4</sub> @graphene foam/PDMS foam | 7.1                  | 1              | 32.4                     | 2         |
| Fe <sub>3</sub> O <sub>4</sub> /Graphene paper          | 50                   | 0.3            | 22                       | 3         |
| LIG/Fe <sub>3</sub> O <sub>4</sub>                      | 10                   | 0.053          | 32.7                     | 4         |
| GF/h-Fe <sub>3</sub> O <sub>4</sub> /PDMS               | 12                   | 2              | 70.37                    | 5         |
| rGO/MWCNT/PDMS                                          | 0.98                 | 2.4            | 56                       | 6         |
| CNTs@PAN-Fe <sub>3</sub> O <sub>4</sub> fibers          | 10                   | 2              | 80                       | 7         |
| Fe <sub>3</sub> O <sub>4</sub> @MWCNT/RGO paper         | 3.2                  | 0.6            | 45.9                     | 8         |
| FCC-GF-PDMS                                             | 13                   | 1              | 48                       | 9         |
| Ni@graphene-PVDF                                        | 10                   | 0.7            | 51.4                     | 10        |
| Ni@porous carbon composite                              | 28.76                | 2              | 48.7                     | 11        |
| D-LIG/Ni-0.8                                            | 5.3                  | 0.171          | 94                       | This work |

## References:

- 1 Menon, A. V.; Madras, G.; Bose, S. Magnetic Alloy-Mwnt Heterostructure as Efficient Electromagnetic Wave Suppressors in Soft Nanocomposites. *Chemistry Select* **2017**, *2*, 7831-7844.
- 2 Zhu, S.; Cheng, Q.; Yu, C.; Pan, X.; Zuo, X.; Liu, J.; Chen, M.; Li, W.; Li, Q.; Liu, L. Flexible

- Fe<sub>3</sub>O<sub>4</sub>/Graphene Foam/Poly Dimethylsiloxane Composite for High-Performance Electromagnetic Interference Shielding. *Compos. Sci. Technol.* **2020**, *189*, 108012.
- 3 Song, W.-L.; Guan, X.-T.; Fan, L.-Z.; Cao, W.-Q.; Wang, C.-Y.; Zhao, Q.-L.; Cao, M.-S. Magnetic and Conductive Graphene Papers toward Thin Layers of Effective Electromagnetic Shielding. *J. Mater. Chem. A* **2015**, *3*, 2097-2107.
- 4 Yu, W.; Peng, Y.; Cao, L.; Zhao, W.; Liu, X. Free-Standing Laser-Induced Graphene Films for High-Performance Electromagnetic Interference Shielding. *Carbon* **2021**, *183*, 600-611.
- 5 Fang, H.; Guo, H.; Hu, Y.; Ren, Y.; Hsu, P.-C.; Bai, S.-L. In-Situ Grown Hollow Fe<sub>3</sub>O<sub>4</sub> onto Graphene Foam Nanocomposites with High Emi Shielding Effectiveness and Thermal Conductivity. *Compos. Sci. Technol.* **2020**, *188*, 107975.
- 6 Jia, H.; Kong, Q.-Q.; Liu, Z.; Wei, X.-X.; Li, X.-M.; Chen, J.-P.; Li, F.; Yang, X.; Sun, G.-H.; Chen, C.-M. 3d Graphene/ Carbon Nanotubes/ Polydimethylsiloxane Composites as High-Performance Electromagnetic Shielding Material in X-Band. *Compos. Part A-Appl. S* **2020**, *129*, 105712.
- 7 Wei, H.; Zheng, W.; Jiang, Z.; Huang, Y. Cnt Coatings Grown on the Outer and Inner Surfaces of Magnetic Hollow Carbon Fibers with Enhanced Electromagnetic Interference Shielding Performance. *J. Mater. Chem. C* **2019**, *7*, 14375-14383.
- 8 Zhou, J.; Tao, H.; Xia, L.; Zhao, H.; Wang, Y.; Zhan, Y.; Yuan, B. An Innovative Ternary Composite Paper of Graphene and Fe<sub>3</sub>O<sub>4</sub> Decorated Multi-Walled Carbon Nanotube for Ultra-Efficient Electromagnetic Interference Shielding and Fire-Resistant Properties. *Compos. Commun.* **2022**, *32*, 101181.
- 9 Yu, C.; Zhu, S.; Xing, C.; Pan, X.; Zuo, X.; Liu, J.; Chen, M.; Liu, L.; Tao, G.; Li, Q. Fe Nanoparticles and Cnts Co-Decorated Porous Carbon/Graphene Foam Composite for

Excellent Electromagnetic Interference Shielding Performance. *J. Alloys Compd.* **2020**, *820*, 153108.

10 Liang, L.; Xu, P.; Wang, Y.; Shang, Y.; Ma, J.; Su, F.; Feng, Y.; He, C.; Wang, Y.; Liu, C. Flexible Polyvinylidene Fluoride Film with Alternating Oriented Graphene/Ni Nanochains for Electromagnetic Interference Shielding and Thermal Management. *Chem. Eng. J.* **2020**, *395*, 125209.

11 Zheng, Y.; Song, Y.; Gao, T.; Yan, S.; Hu, H.; Cao, F.; Duan, Y.; Zhang, X. Lightweight and Hydrophobic Three-Dimensional Wood-Derived Anisotropic Magnetic Porous Carbon for Highly Efficient Electromagnetic Interference Shielding. *ACS Appl. Mater. Interfaces* **2020**, *12*, 40802-40814.
